# Supplementary material
Source: PubMed Central journal article supplement (PMC7054148)
Supplement: NIHMS1063127-supplement-Supp_TableS1.pdf [file NIHMS1063127-supplement-Supp_TableS1.pdf]

|        | Genetic length<br>(cM) | Physical<br>length (Mb) | Mean rate<br>(cM/Mb) | Hotspots |
|--------|------------------------|-------------------------|----------------------|----------|
| Genome | -144.26                | 45.33                   | -0.08                | -14,056  |
| ECA1   | -7.02                  | 2.42                    | -0.06                | -1,118   |
| ECA2   | -6.03                  | 0.61                    | -0.05                | -693     |
| ECA3   | -0.48                  | 1.98                    | -0.02                | -744     |
| ECA4   | -6.84                  | 1.00                    | -0.07                | -668     |
| ECA5   | -13.94                 | -2.83                   | -0.11                | -638     |
| ECA6   | -3.15                  | 2.60                    | -0.07                | -518     |
| ECA7   | -5.74                  | 2.36                    | -0.08                | -556     |
| ECA8   | -1.86                  | 3.62                    | -0.06                | -429     |
| ECA9   | 0.48                   | 2.31                    | -0.02                | -539     |
| ECA10  | -3.83                  | 1.24                    | -0.07                | -537     |
| ECA11  | -0.49                  | 0.47                    | -0.02                | -273     |
| ECA12  | 0.98                   | 4.03                    | -0.21                | -196     |
| ECA13  | -0.22                  | 1.32                    | -0.05                | -153     |
| ECA14  | -3.67                  | 0.81                    | -0.05                | -585     |
| ECA15  | -1.37                  | 1.38                    | -0.03                | -545     |
| ECA16  | -0.46                  | 1.70                    | -0.03                | -536     |
| ECA17  | -9.19                  | 0.08                    | -0.12                | -504     |
| ECA18  | -7.53                  | 0.20                    | -0.1                 | -513     |
| ECA19  | -0.19                  | 2.81                    | -0.06                | -253     |
| ECA20  | -6.35                  | 1.13                    | -0.12                | -409     |
| ECA21  | -2.17                  | 1.33                    | -0.07                | -359     |
| ECA22  | -0.48                  | 1.10                    | -0.03                | -265     |
| ECA23  | -3.82                  | -0.04                   | -0.07                | -420     |
| ECA24  | -0.01                  | 1.71                    | -0.05                | -218     |
| ECA25  | -0.91                  | 0.86                    | -0.05                | -249     |
| ECA26  | -2.69                  | 1.36                    | -0.11                | -353     |
| ECA27  | -3.72                  | 0.40                    | -0.11                | -276     |
| ECA28  | 0.66                   | 1.28                    | -0.01                | -185     |
| ECA29  | 0.26                   | 1.21                    | -0.05                | -183     |
| ECA30  | -0.68                  | 1.44                    | -0.09                | -244     |
| ECA31  | -0.21                  | 1.13                    | -0.07                | 401      |
| ECAX   | -53.60                 | 4.21                    | -0.48                | -1,298   |

**Supplemental Table S1.** Differences in physical length, genetic map length, recombination rate, and number of predicted hotspots between the previous equine recombination map and the updated map. Actual values from EquCab3 are available in Table 1 and values from EquCab2 are available in Beeson et al (2019). Cell colors represent the change from EquCab2 to EquCab3: blue and orange represent increases and decreases in the updated map relative to the original map.
