# Supplementary material
Source: PubMed Central journal article supplement (PMC7054148)
Supplement: NIHMS1063127-supplement-Supp_TableS2.pdf [file NIHMS1063127-supplement-Supp_TableS2.pdf]

| Breed              | Recombination Rate | Total Hotspots | Median hotspot width (range) | Mean hotspot rate (range) |
|--------------------|--------------------|----------------|------------------------------|---------------------------|
| Arabian            | 0.95               | 31,927         | 4.61<br>(1.0-54.1)           | 2.43<br>(0.68-152.46)     |
| Belgian            | 1.39               | 39,218         | 4.60<br>(1.0-49.0)           | 3.41<br>(1.15-169.0)      |
| Franches-Montagnes | 1.13               | 38,131         | 4.48<br>(1.0-50.9)           | 2.56<br>(0.94-277.98)     |
| French Trotter     | 1.36               | 45,604         | 4.30<br>(1.0-45.98)          | 3.43<br>(1.10-122.87)     |
| Icelandic          | 2.11               | 38,999         | 4.90<br>(1.0-68.0)           | 5.22<br>(1.77-198.19)     |
| Lusitano           | 1.30               | 36,207         | 4.70<br>(1.0-49.1)           | 3.06<br>(1.13-125.50)     |
| Maremmano          | 1.31               | 40,204         | 4.70<br>(1.0-50.1)           | 3.07<br>(1.12-129.69)     |
| Morgan             | 1.14               | 50,953         | 3.70<br>(1.0-37.7)           | 2.89<br>(0.93-147.89)     |
| Quarter Horse      | 0.90               | 50,814         | 3.60<br>(1.0-37.1)           | 2.45<br>(0.73-92.41)      |
| Standardbred       | 1.48               | 43,069         | 4.00<br>(1.0-50.0)           | 2.45<br>(0.92-211.31)     |
| Thoroughbred       | 1.53               | 21,992         | 5.44<br>(1.0-55.2)           | 3.10<br>(1.14-171.37)     |
| Welsh Pony         | 1.07               | 47,802         | 3.90<br>(1.0-42.1)           | 3.00<br>(0.76-156.50)     |

**Supplemental Table S2.** Summary of breed-specific recombination maps. Recombination rate refers to the average genome-wide recombination rate in cM/Mb. Median hotspot width is in kb. Mean hotspot rates are in cM/Mb and represent average rate per Mb across all hotspots combined.
