# Supplementary material
Source: PubMed Central journal article supplement (PMC7054148)

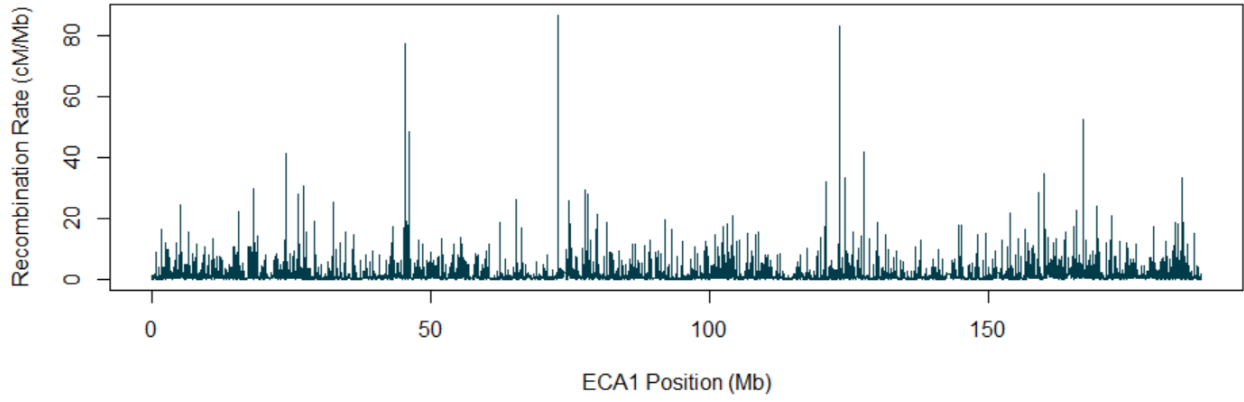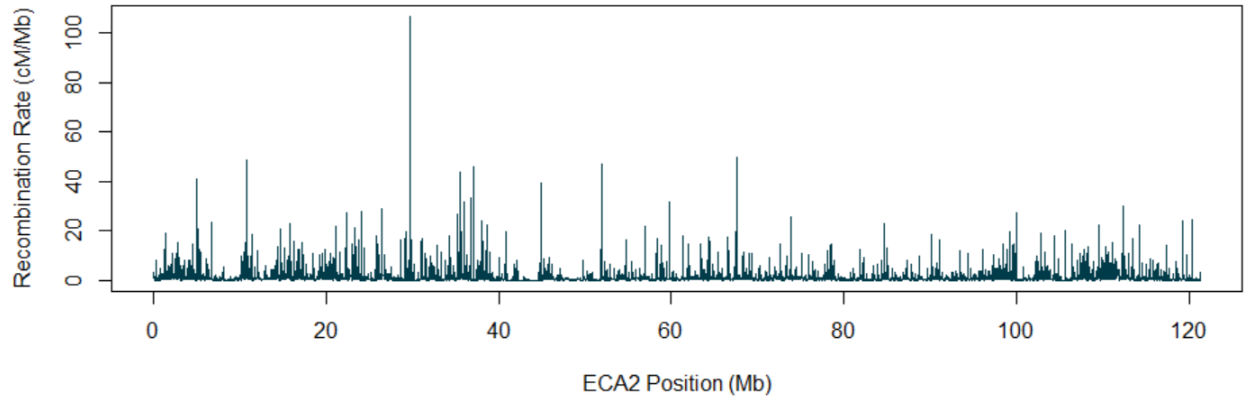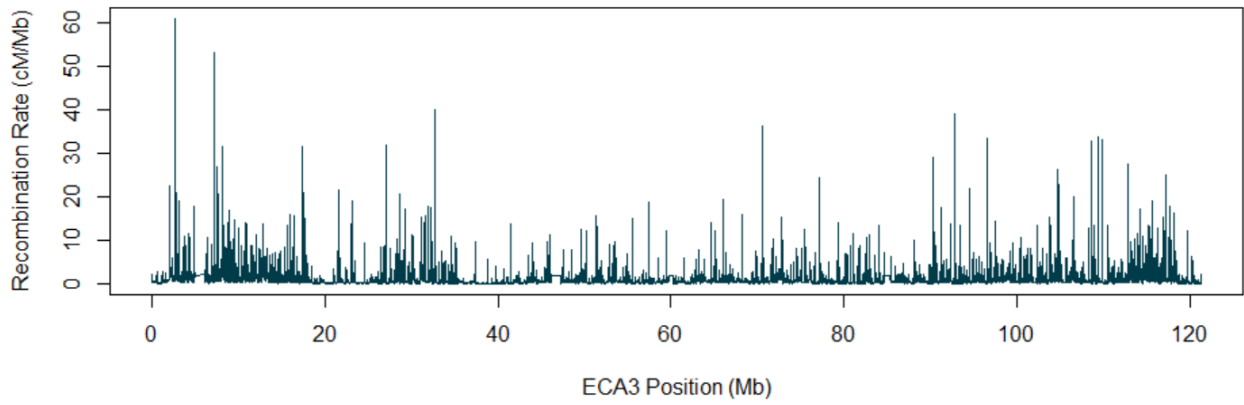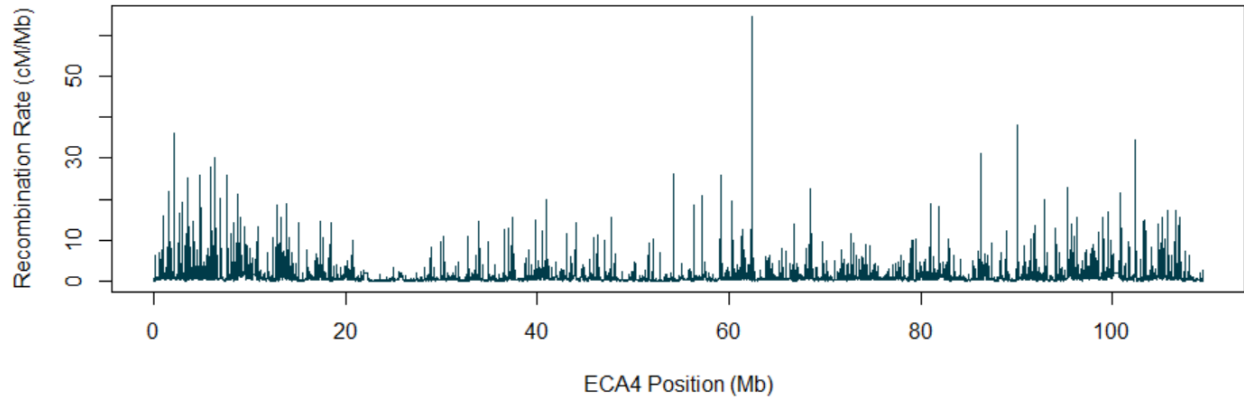

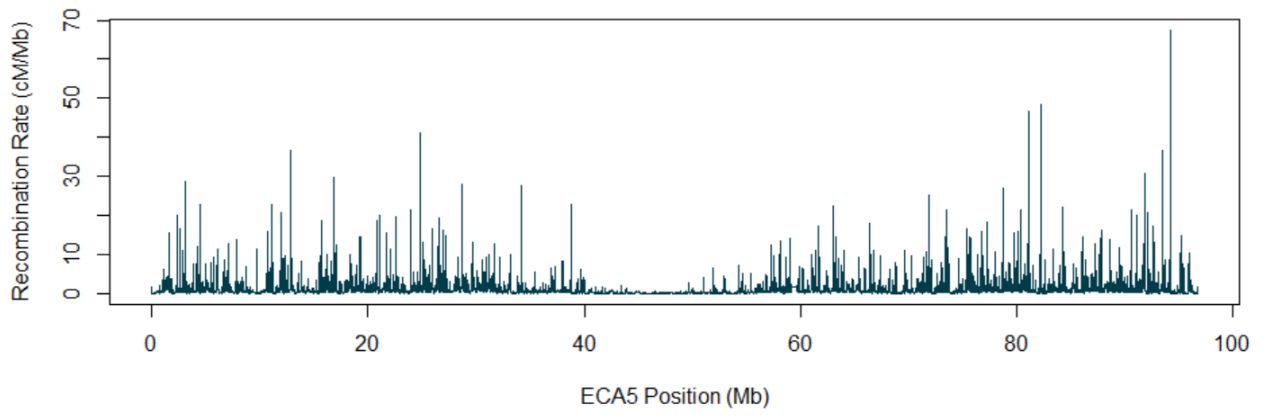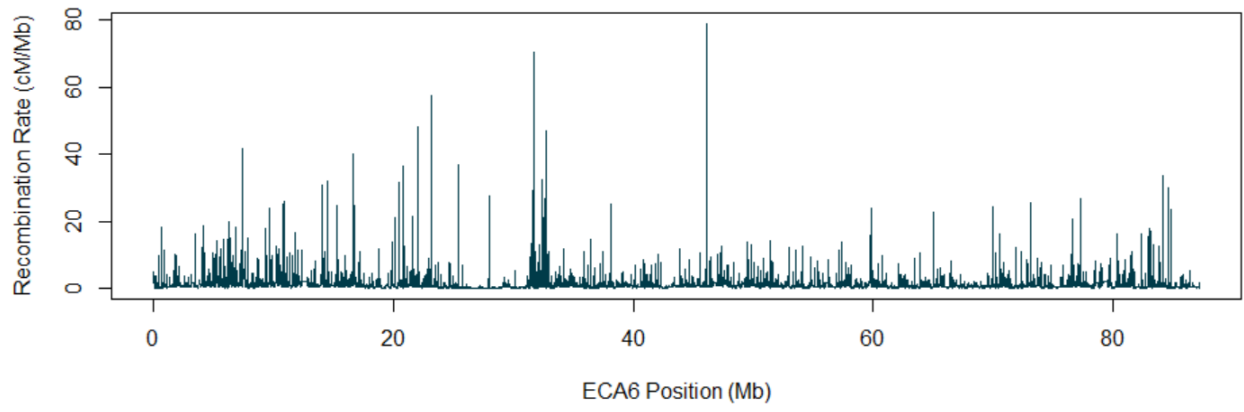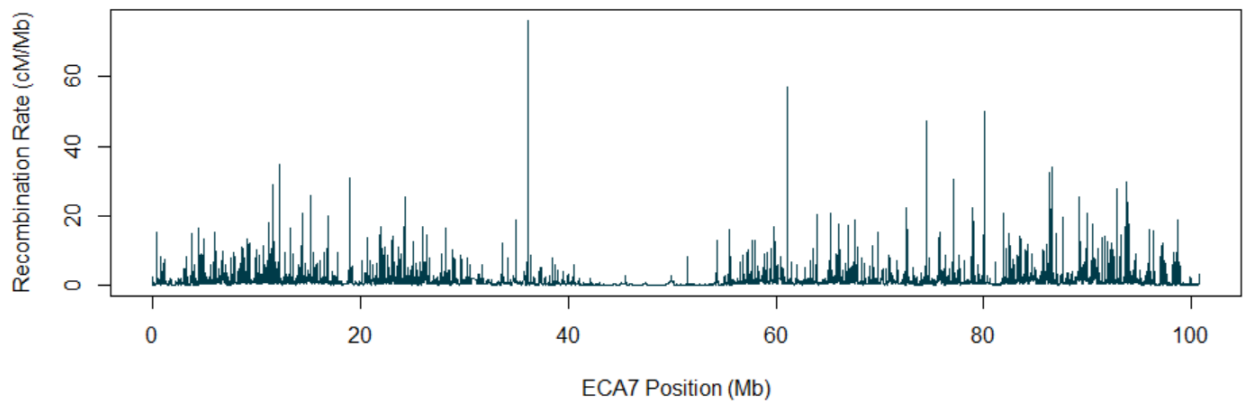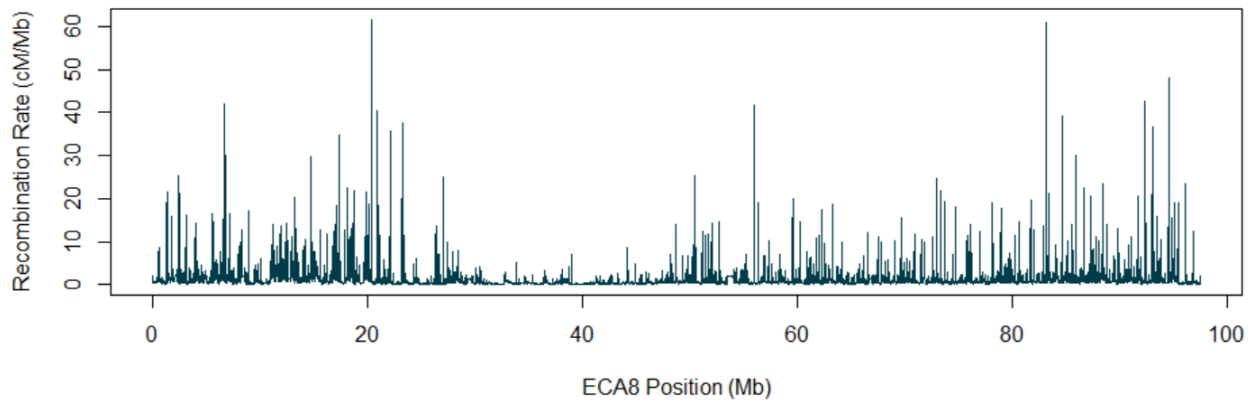

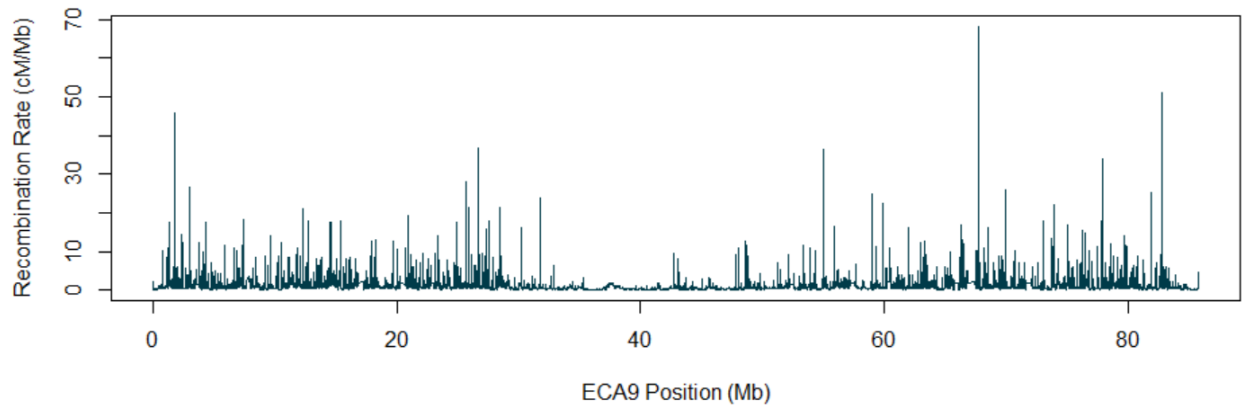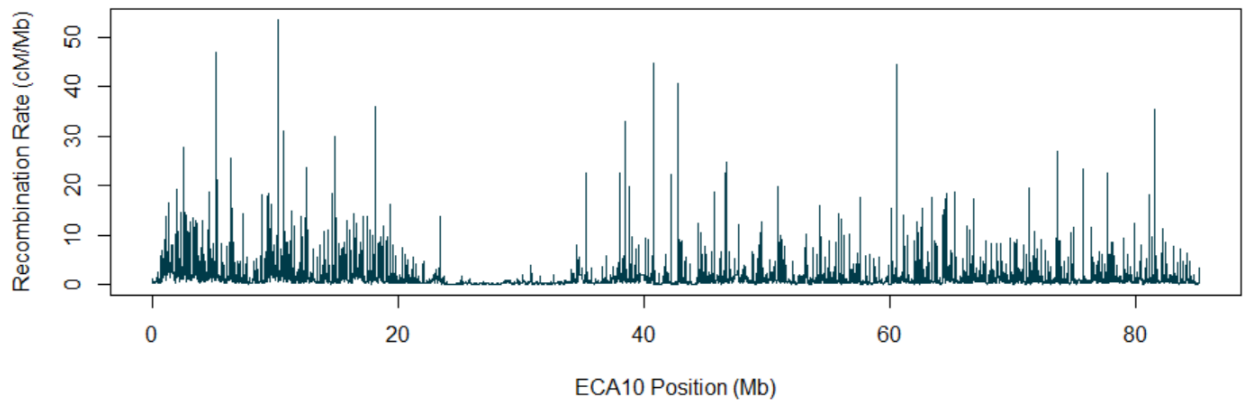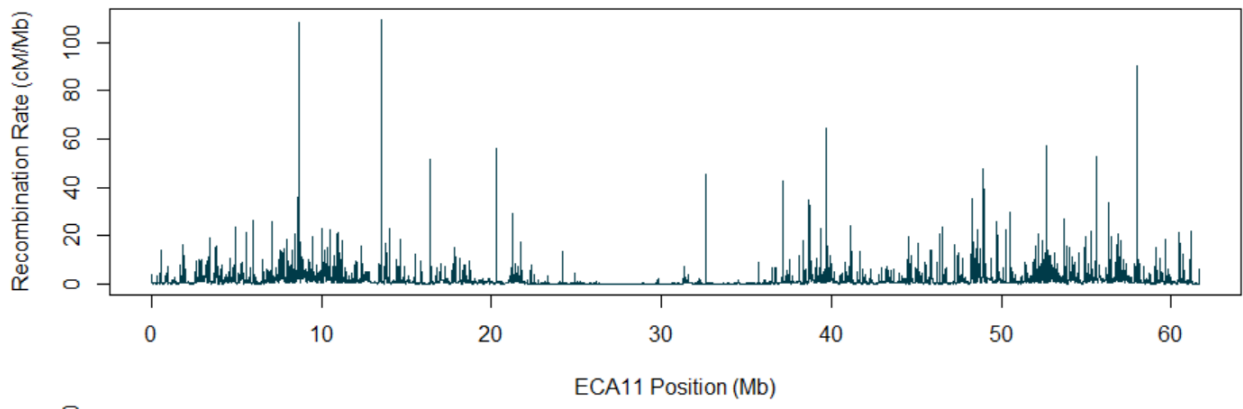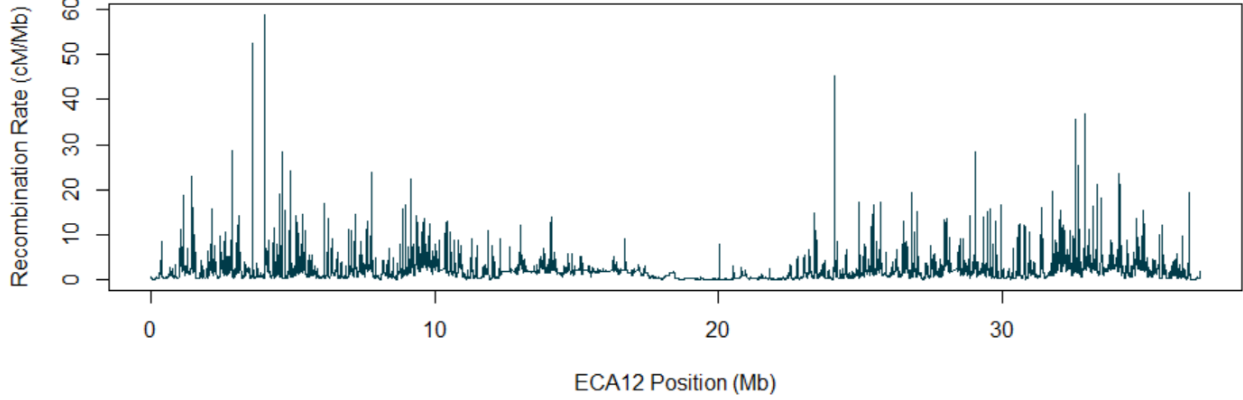

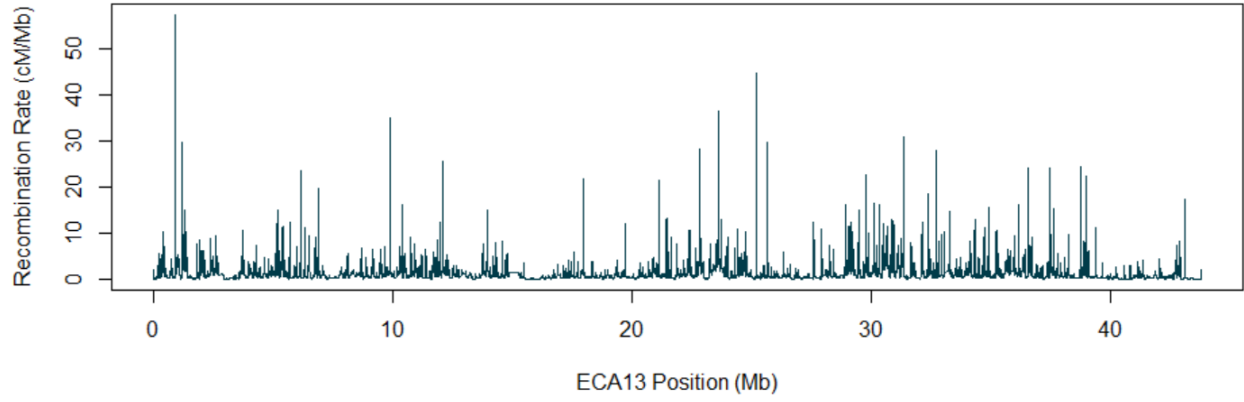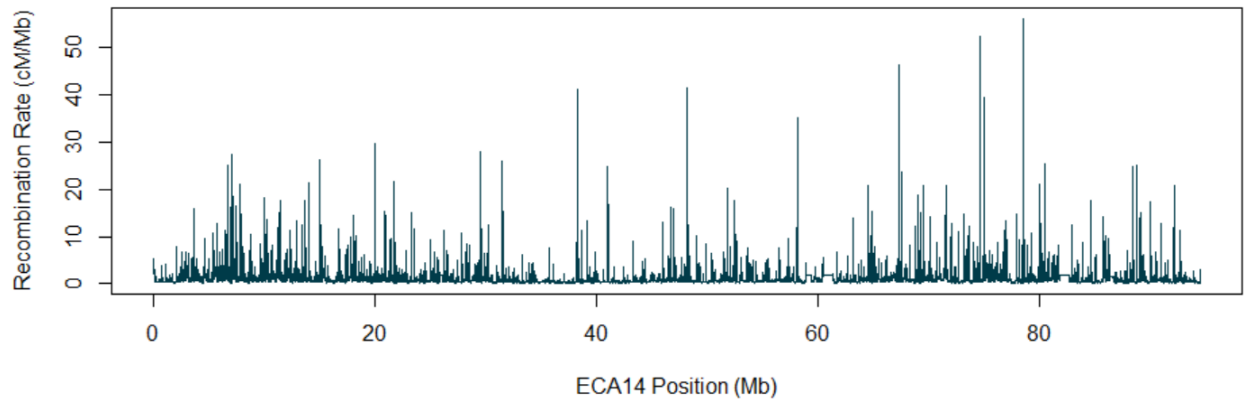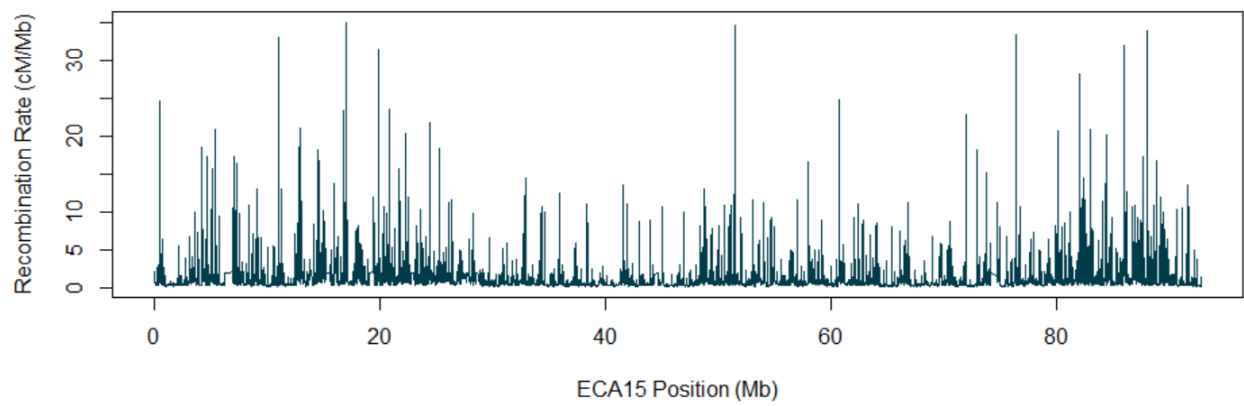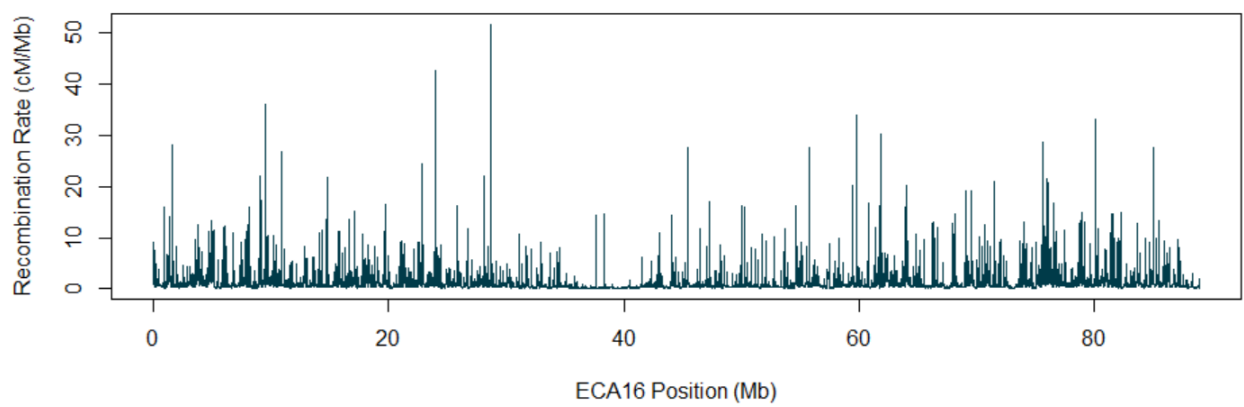

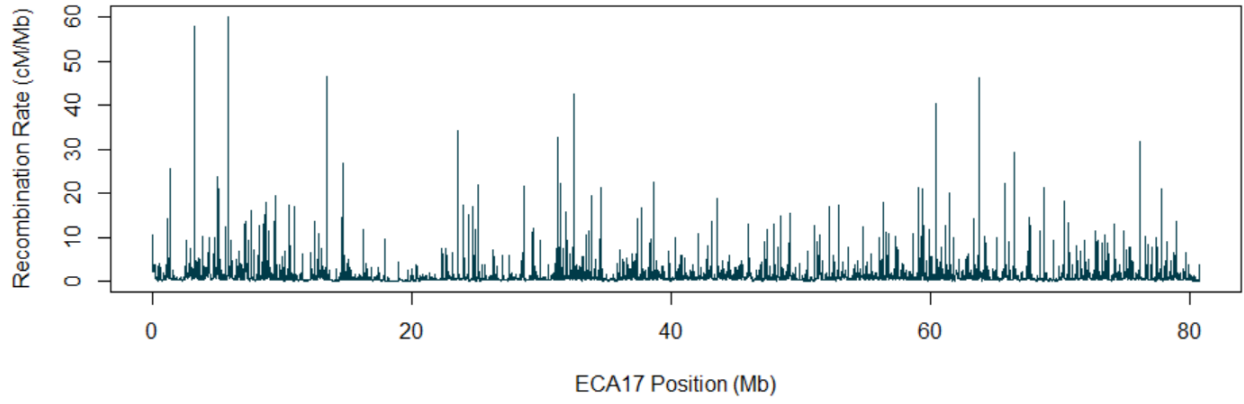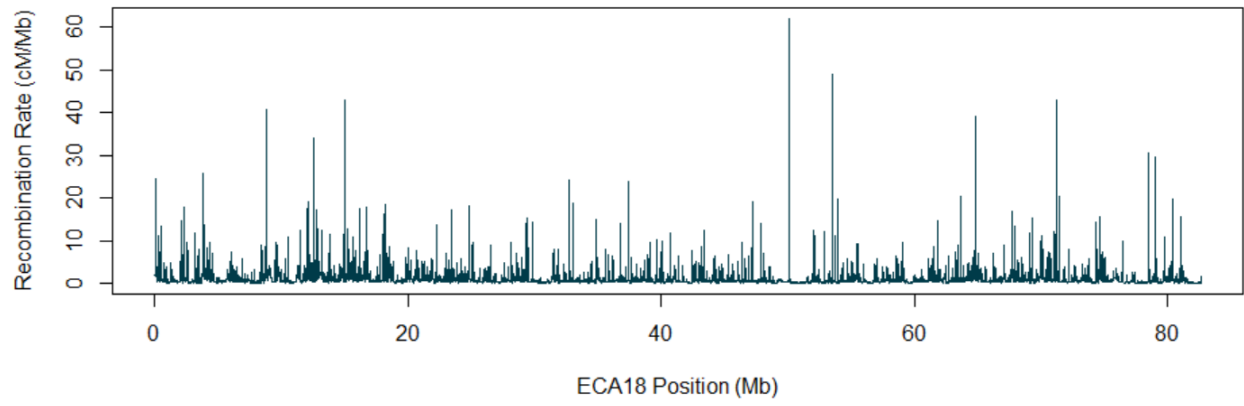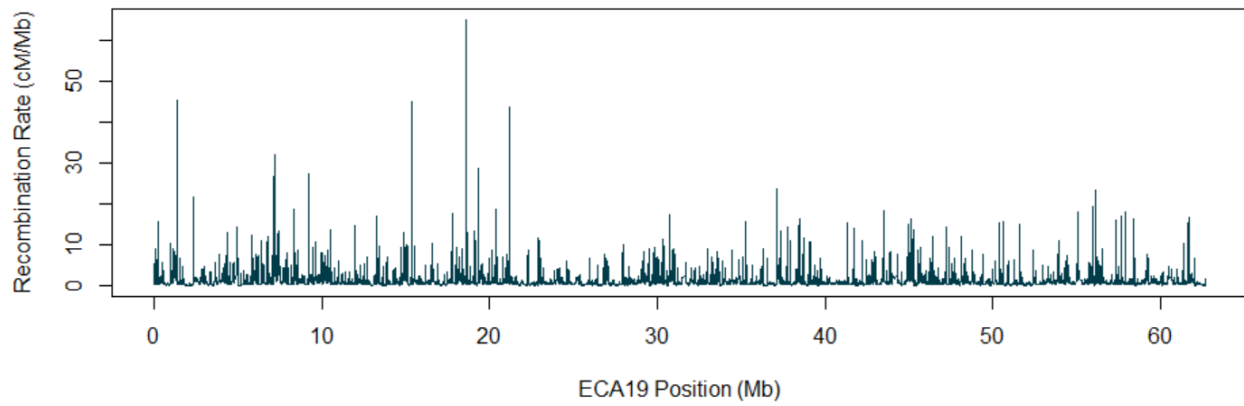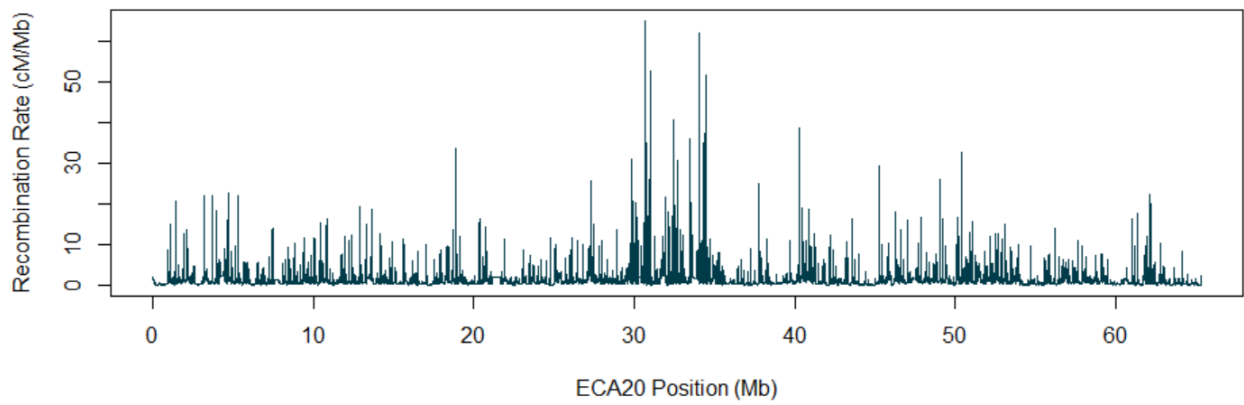

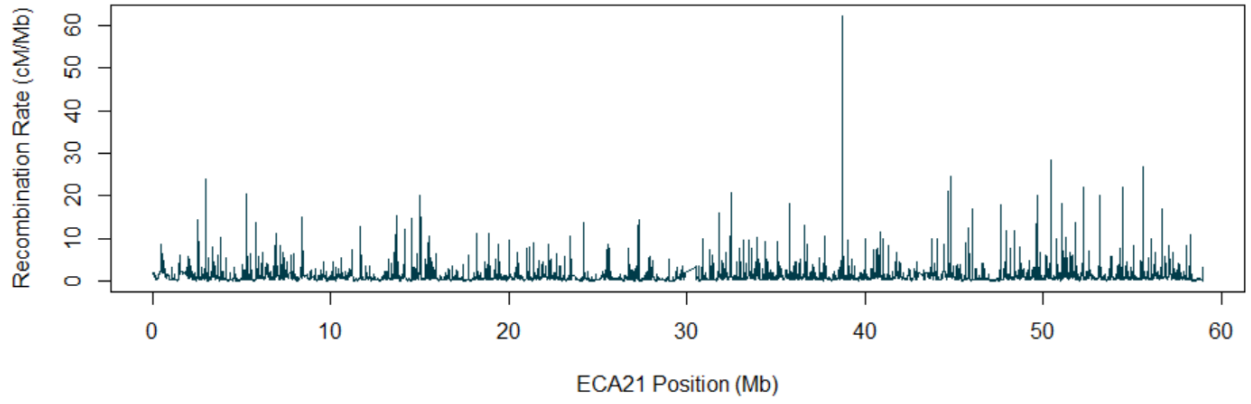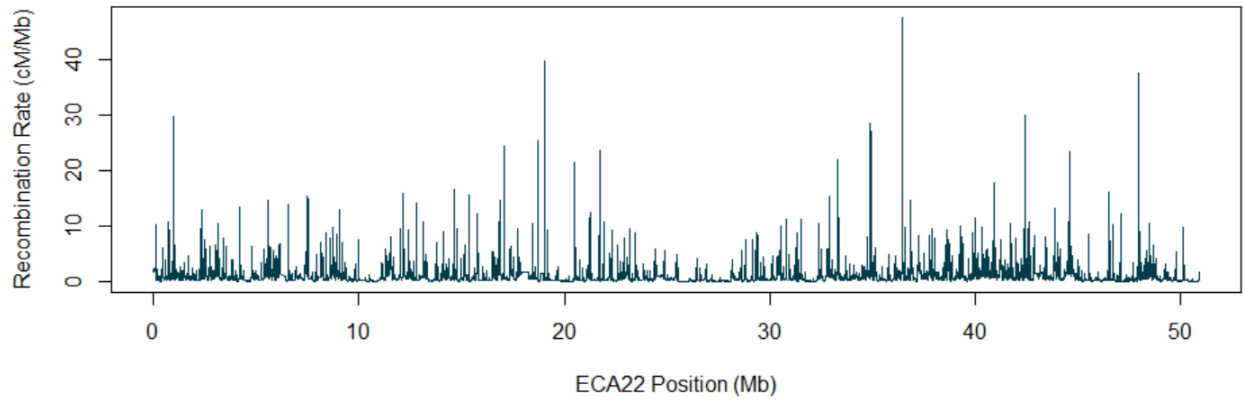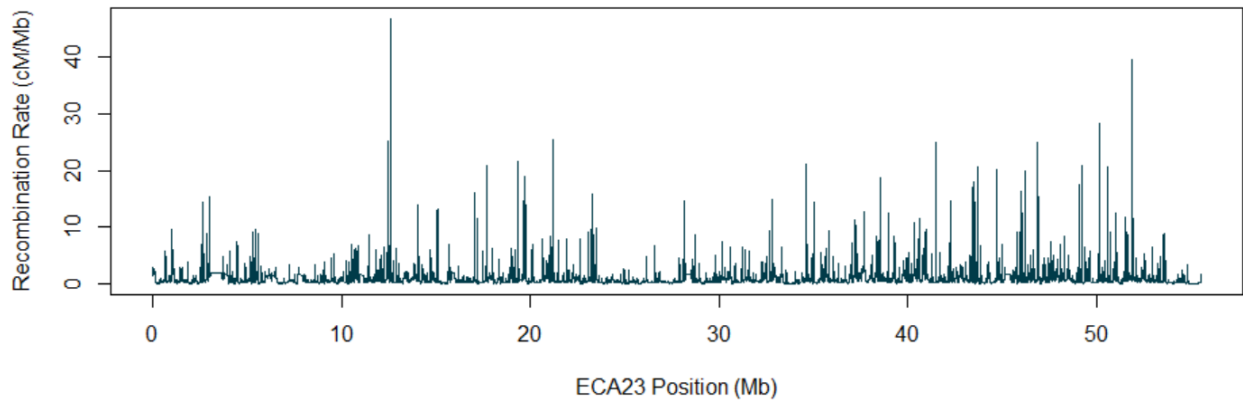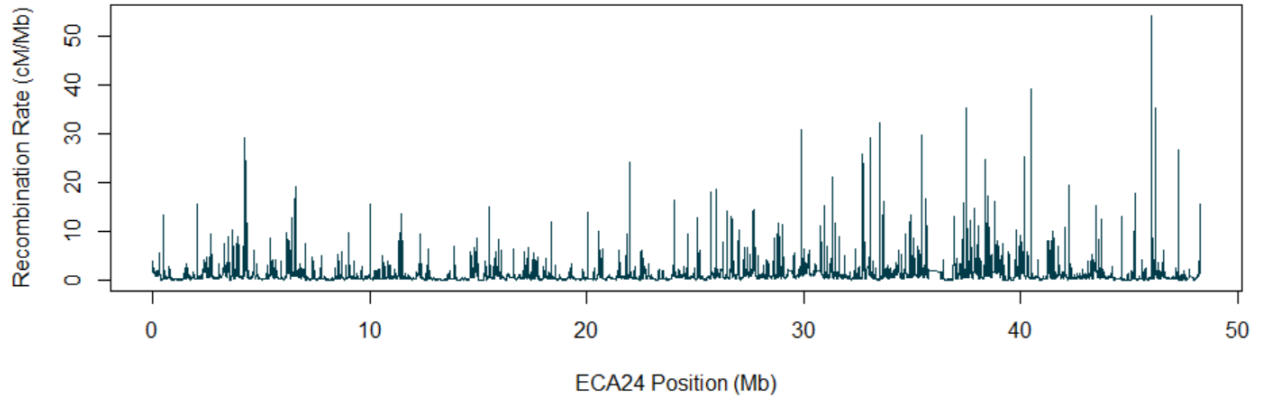

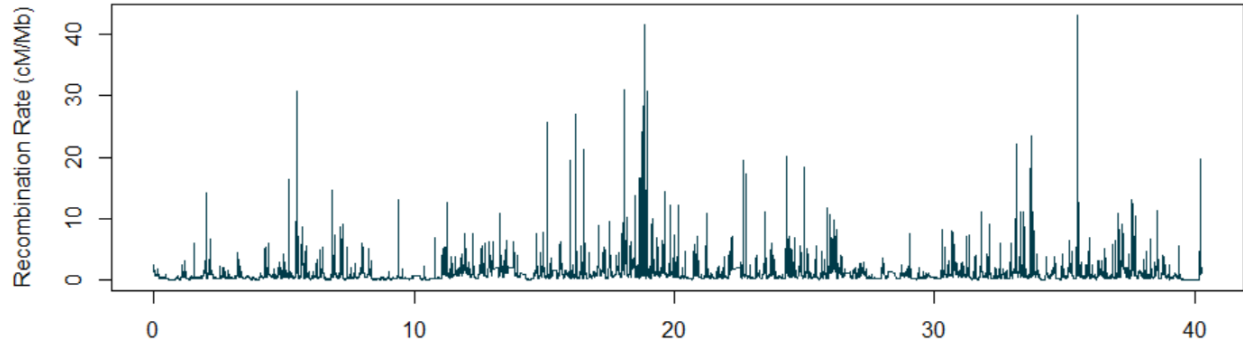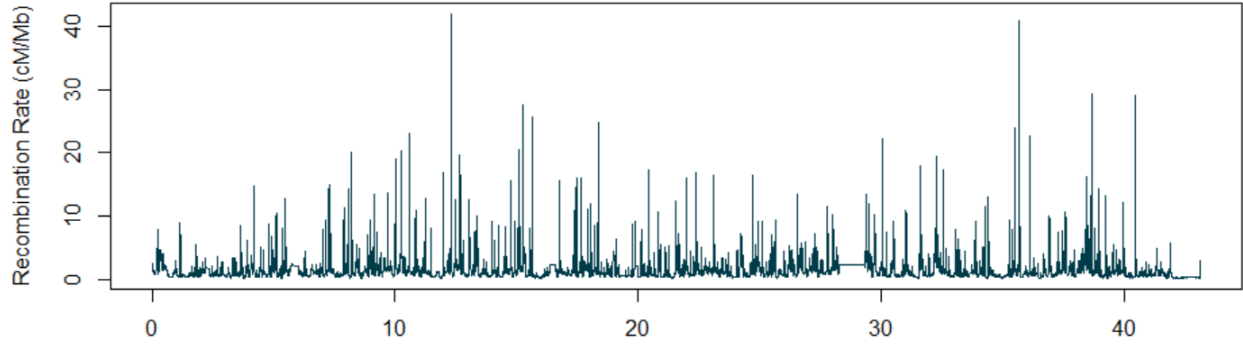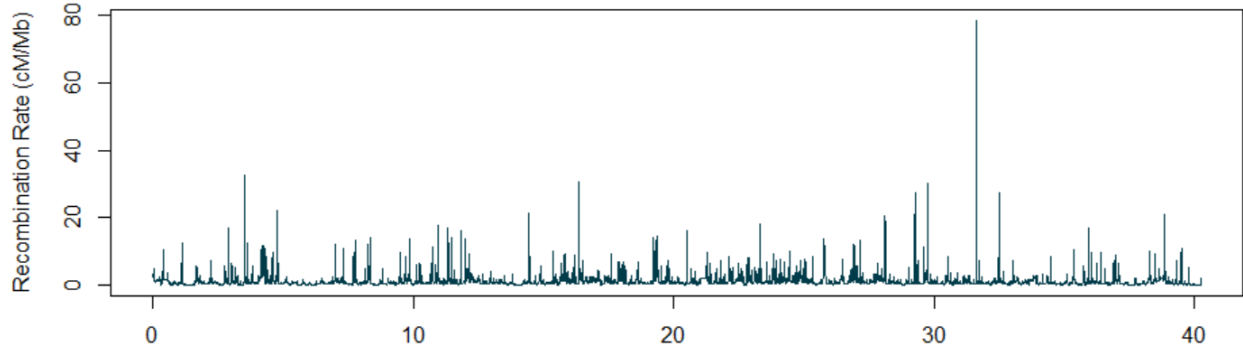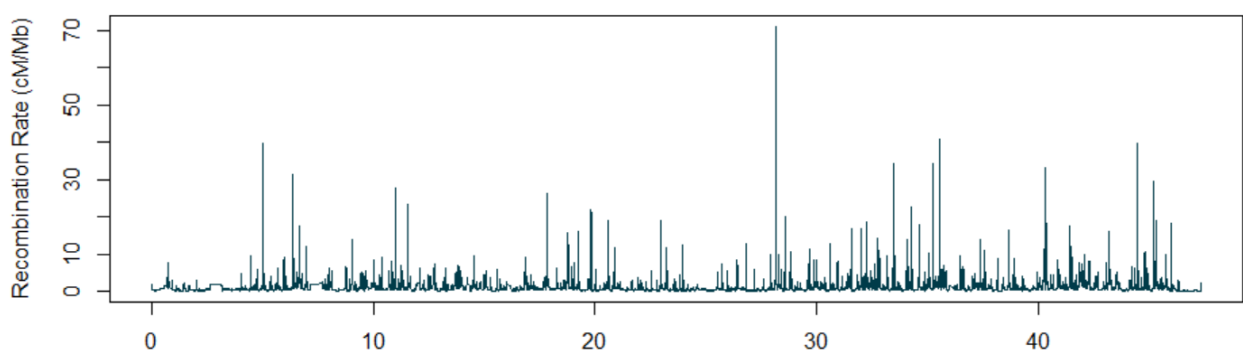

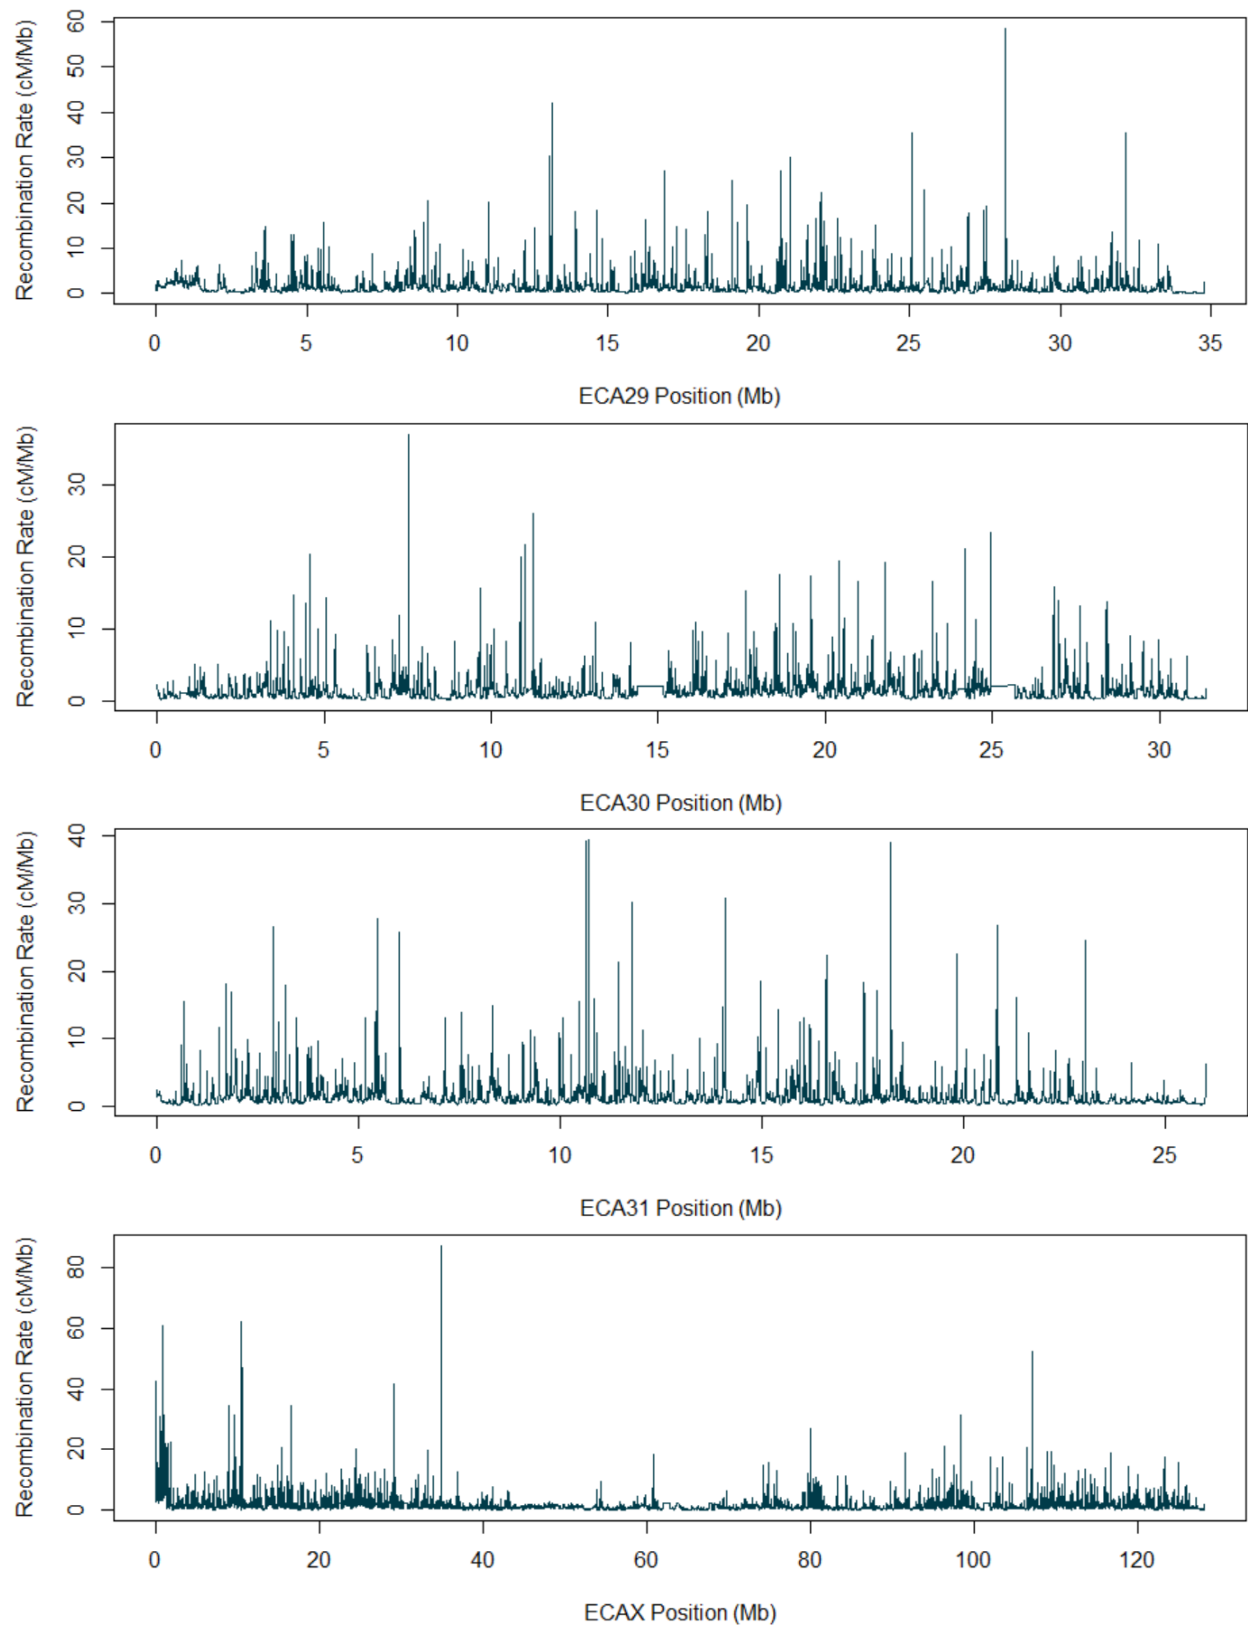

**Supplemental Figure S1.** Recombination rates across all equine autosomes and chromosome X.

Supplement: NIHMS1063127-supplement-Supp_FigS1.pdf [file NIHMS1063127-supplement-Supp_FigS1.pdf]
